# Supplementary material
Source: HighWire-hosted journal article supplement (https://sti.bmj.com/content/sextrans-2020-054764)

**Figure S1. Correlation between the weekly number of tongue-kissing, penile-oral sex and insertive rimming partners.**

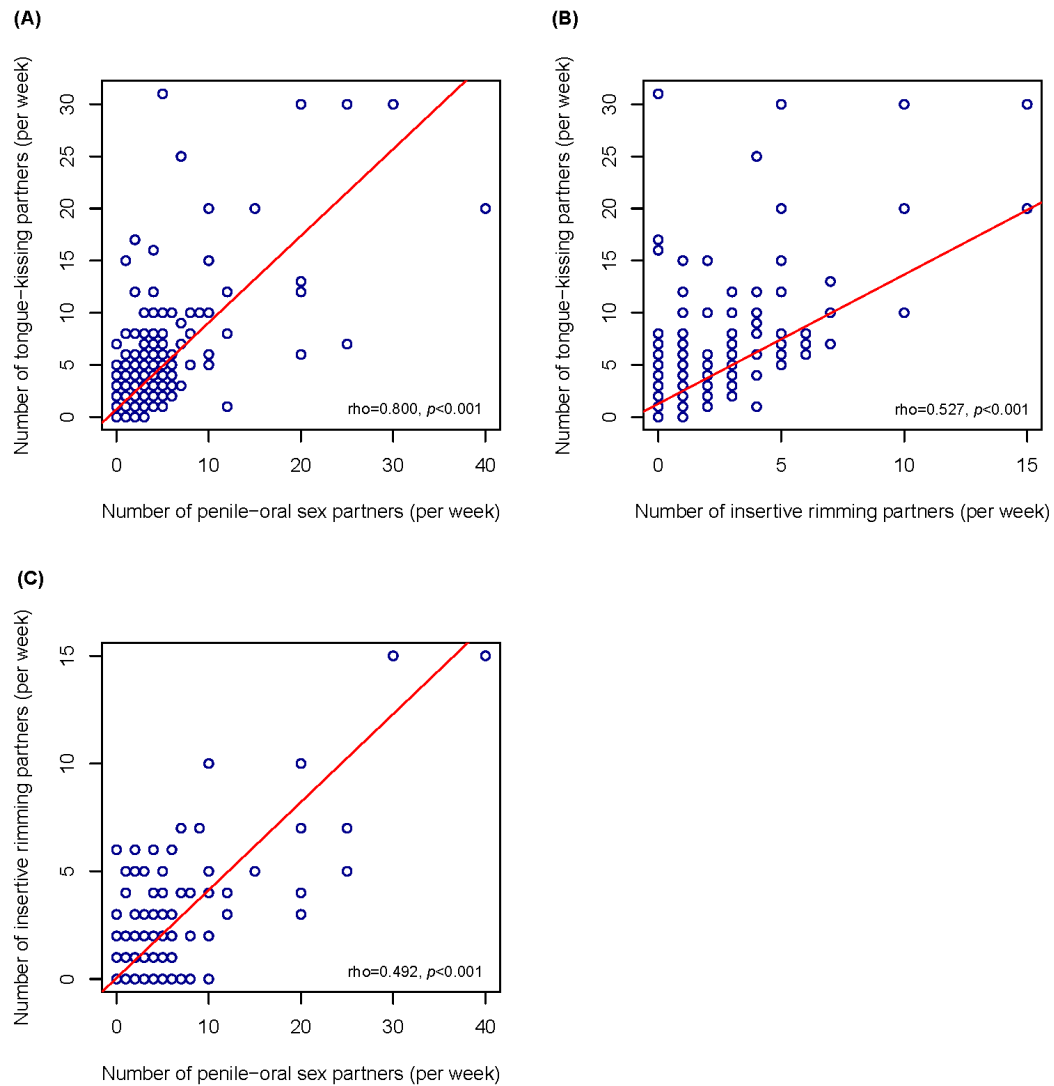

Supplement: inline-supplementary-material-1 [file inline-supplementary-material-1.pdf]
