# Supplementary material
Source: HighWire-hosted journal article supplement (https://sti.bmj.com/content/sextrans-2020-054764)
Supplement: inline-supplementary-material-2 [file inline-supplementary-material-2.pdf]

**Table S1. The overall agreement (concordance) between the oropharyngeal swabs and saliva samples for *N. gonorrhoeae* at week 0.**

| Saliva sample | Oropharyngeal Swab |          | Total |
|---------------|--------------------|----------|-------|
|               | Positive           | Negative |       |
| Positive      | 15*                | 0        | 15    |
| Negative      | 2                  | 82       | 84    |
| Total         | 17                 | 82       | 99^   |

*\*Including four men with indeterminate results on saliva sample and oropharyngeal swab.*

*^One man did not have the swab and saliva collected at week 0.*
