# Supplementary material
Source: HighWire-hosted journal article supplement (https://sti.bmj.com/content/sextrans-2020-054764)
Supplement: inline-supplementary-material-3 [file inline-supplementary-material-3.pdf]

**Table S2. The overall agreement (concordance) between the oropharyngeal swabs and saliva samples for *N. gonorrhoeae* at week 12.**

| Saliva sample | Oropharyngeal Swab |          | Total |
|---------------|--------------------|----------|-------|
|               | Positive           | Negative |       |
| Positive      | 4*                 | 0        | 4     |
| Negative      | 6                  | 85       | 91    |
| Total         | 10                 | 85       | 95^   |

\*Including two men with indeterminate results on saliva sample.

^Five men did not have the swab and saliva collected at week 12.
