# Supplementary material
Source: HighWire-hosted journal article supplement (https://sti.bmj.com/content/sextrans-2020-054764)
Supplement: inline-supplementary-material-5 [file inline-supplementary-material-5.pdf]

**Table S4. The overall agreement (concordance) between the oropharyngeal swabs and saliva samples for *C. trachomatis* at week 12.**

| Saliva sample | Oropharyngeal Swab |          | Total           |
|---------------|--------------------|----------|-----------------|
|               | Positive           | Negative |                 |
| Positive      | 1                  | 0        | 1               |
| Negative      | 0                  | 94       | 94              |
| Total         | 1                  | 94       | 95 <sup>^</sup> |

<sup>^</sup>Five men did not have the swab and saliva collected at week 12.
